# Supplementary material for: Forward Genetics Approach Reveals Host Genotype-Dependent Importance of Accessory Chromosomes in the Fungal Wheat Pathogen Zymoseptoria tritici
Source: PubMed Central journal article supplement (PMC5705923; doi:10.1128/mbio.01919-17), 2017-11-28
Supplement: mbo006173611sf4.pdf [file mbo006173611sf4.pdf]

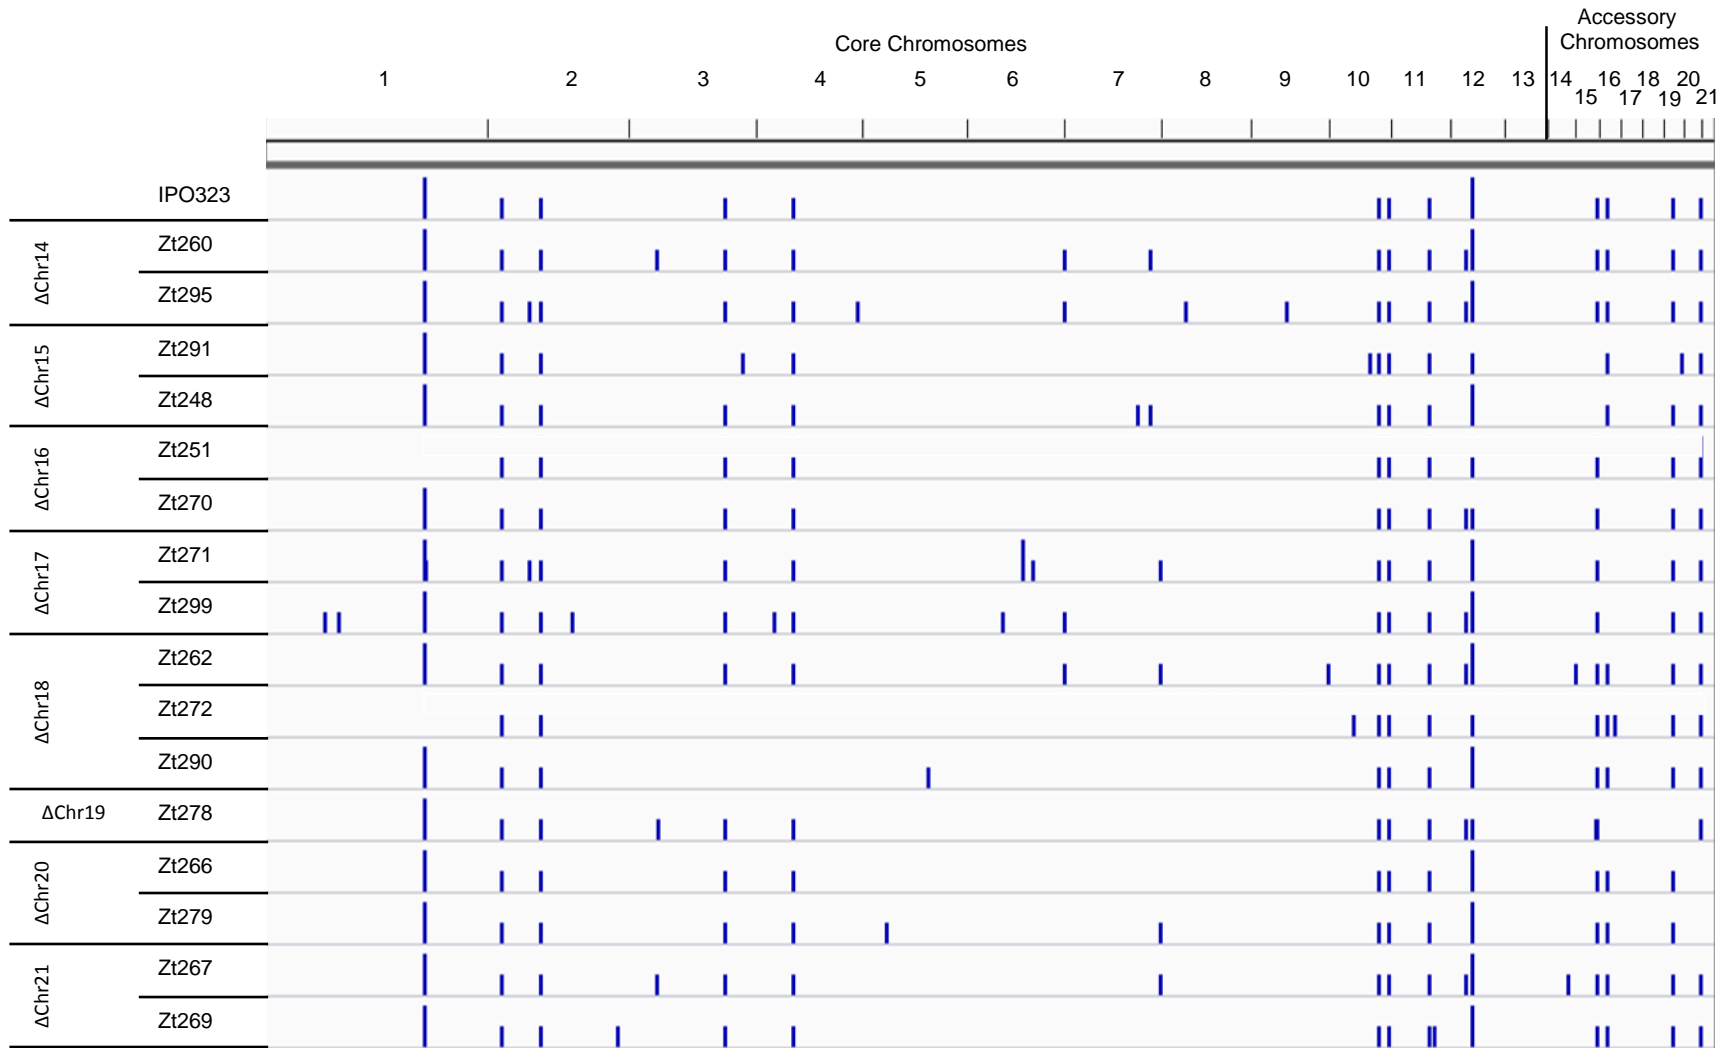

**FIG S4** Illustration of the location of all single nucleotide polymorphisms (SNPs) and indels identified in all sequenced strains. Genome-wide distribution of SNPs across the thirteen core and eight accessory chromosomes of the reference strain IPO323.
